# Supplementary material
Source: PubMed Central journal article supplement (PMC6410741)

# Left kidneys of controls

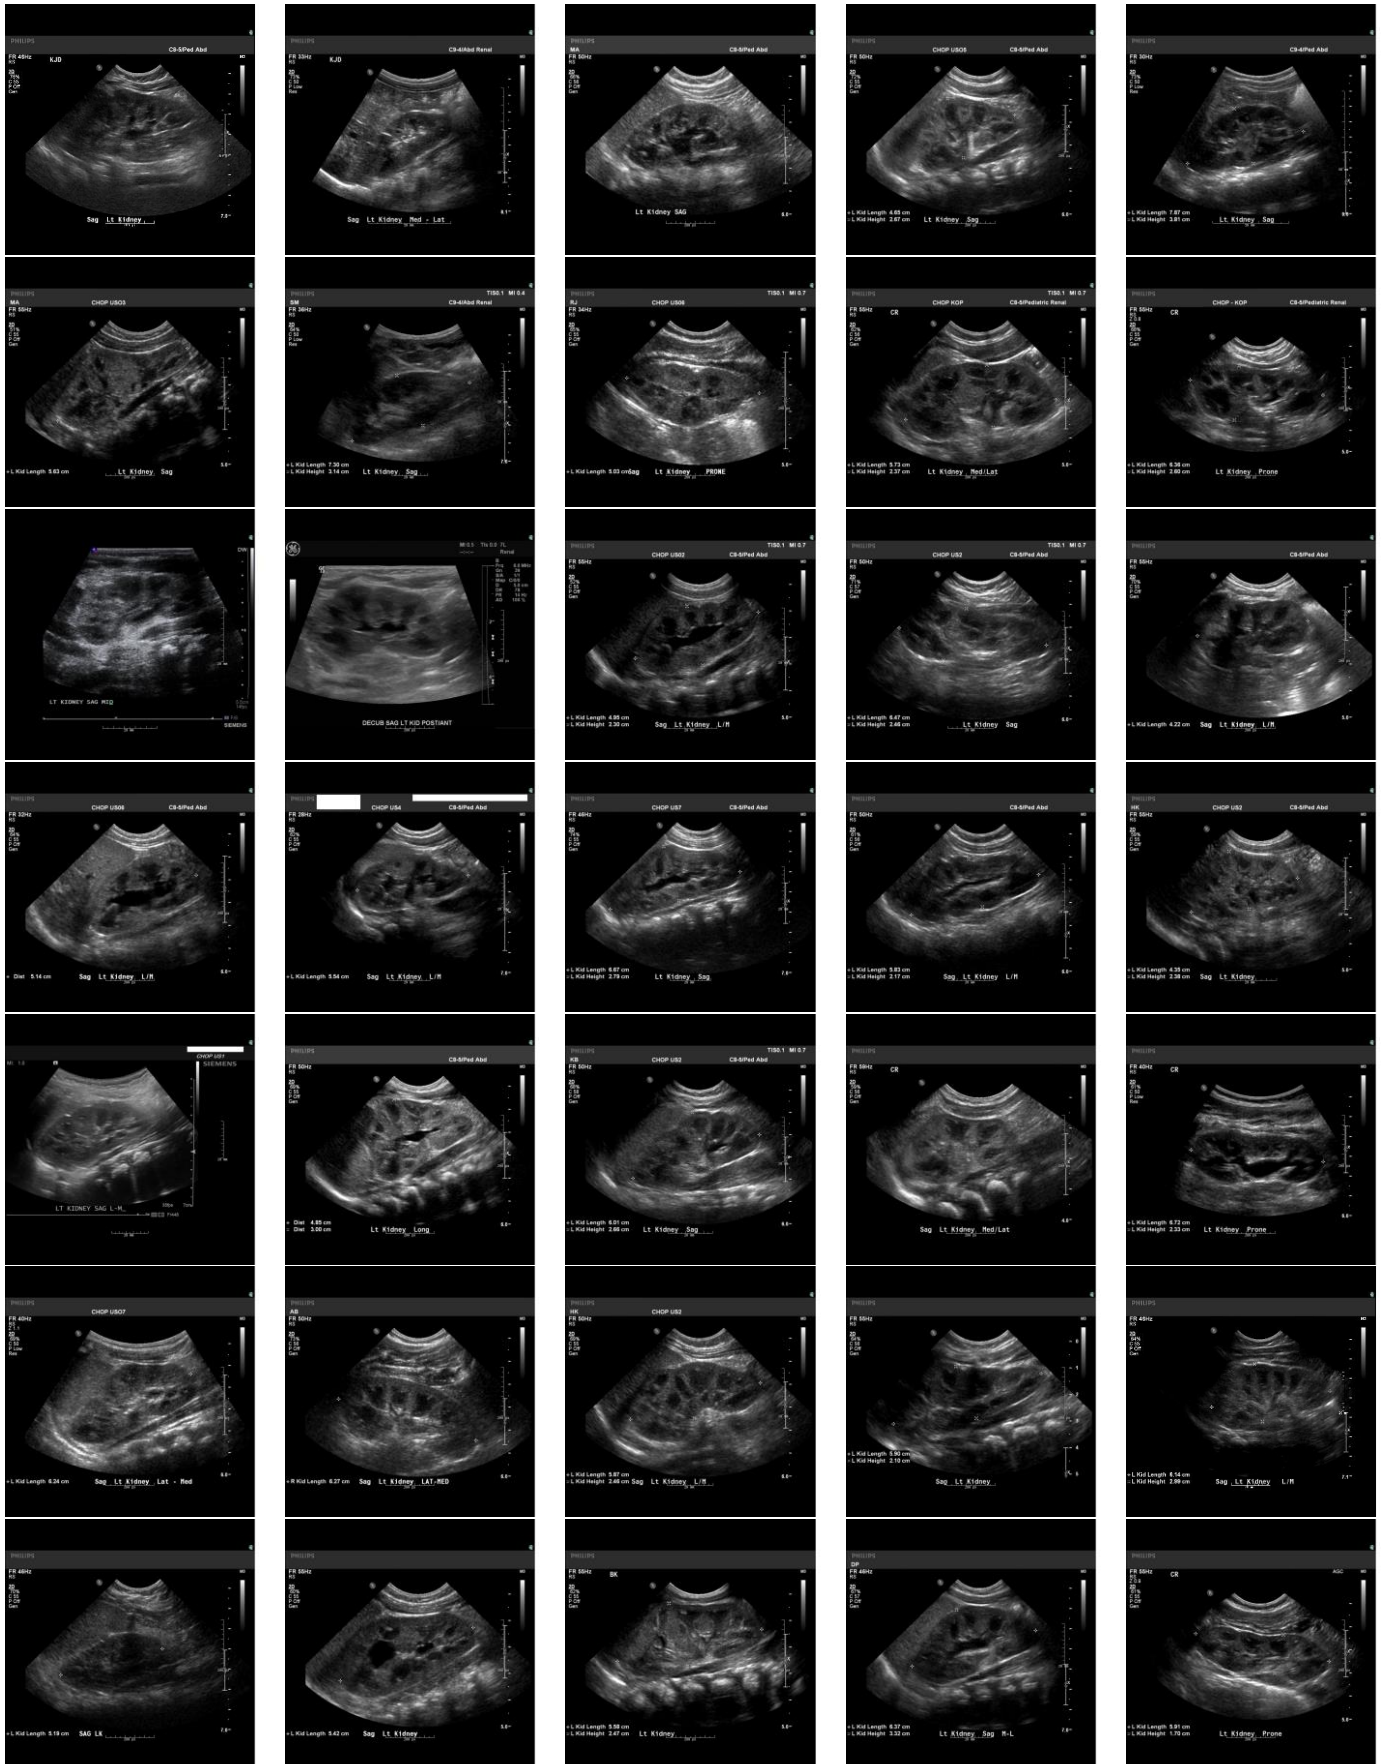

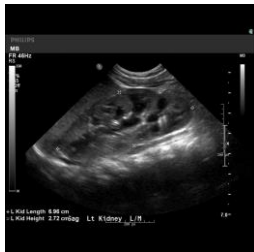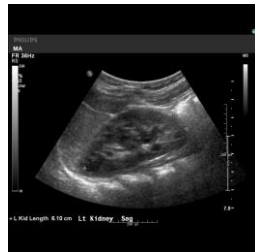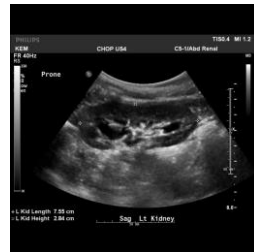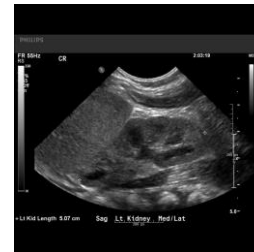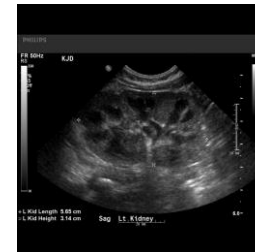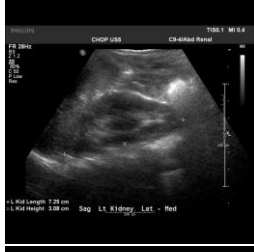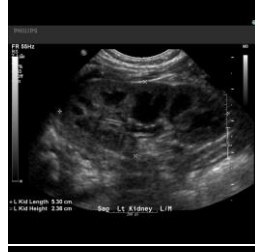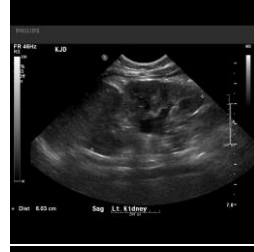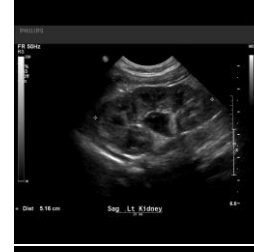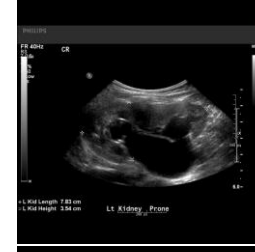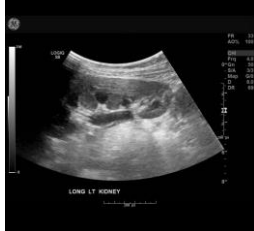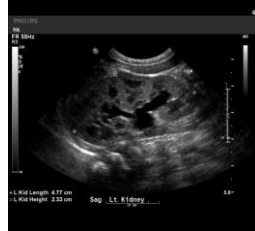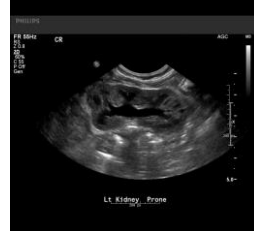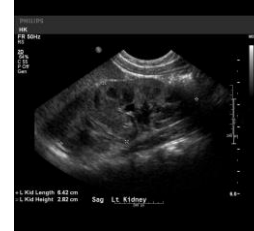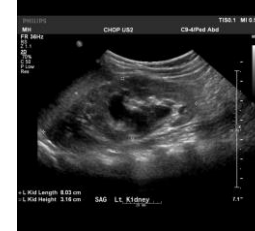

# Right kidneys of controls

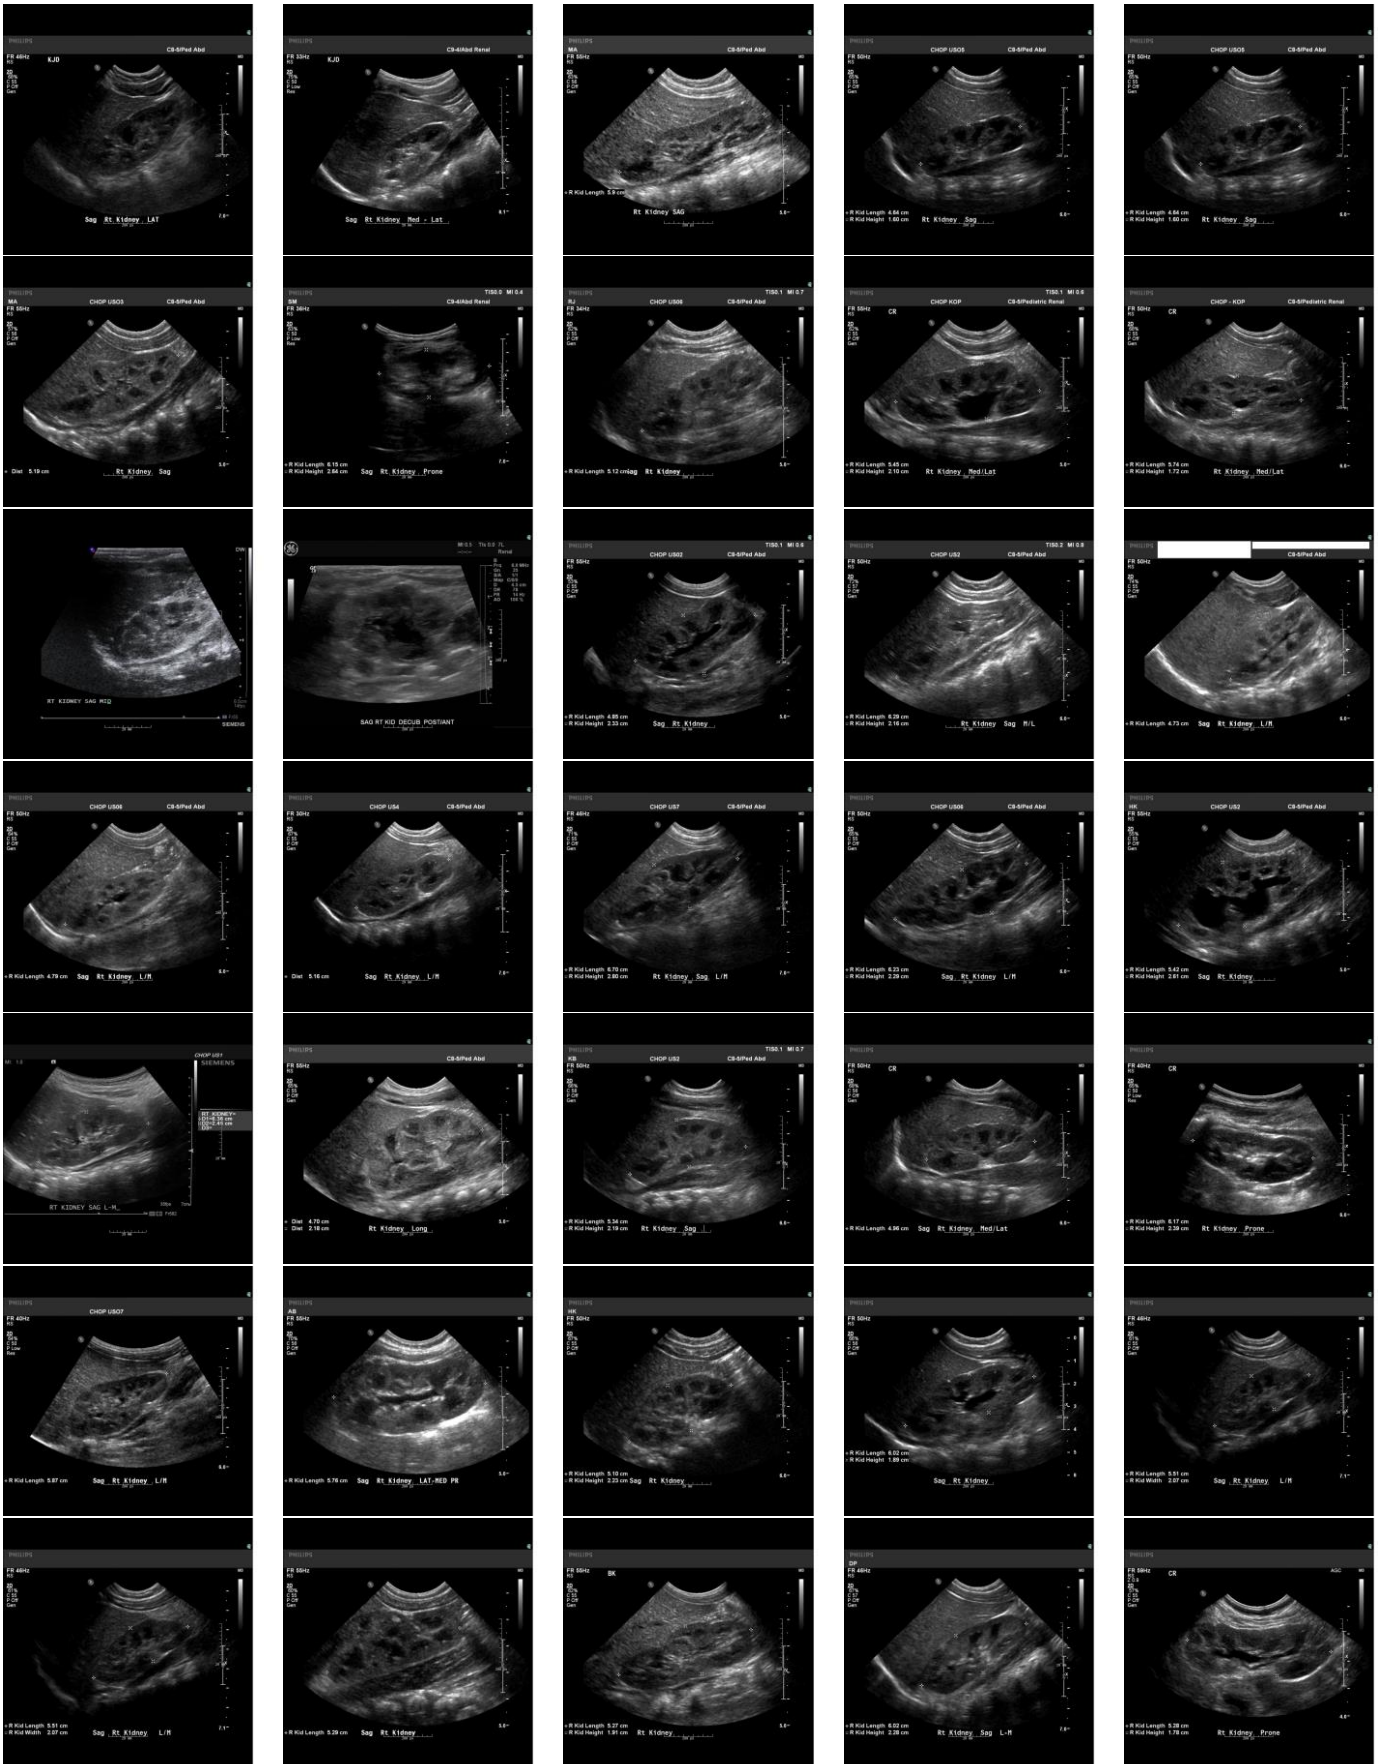

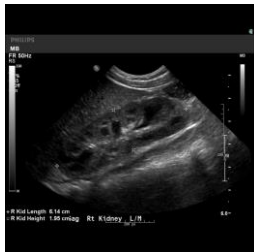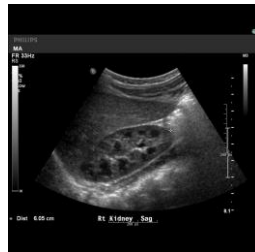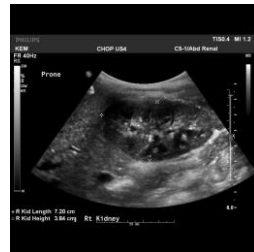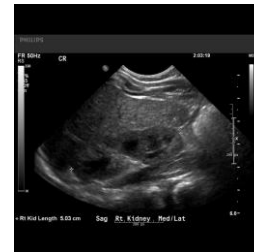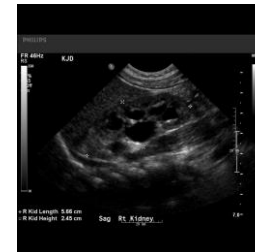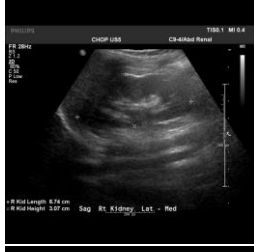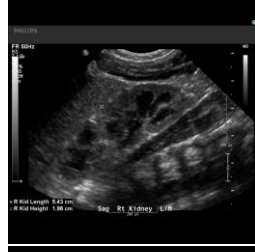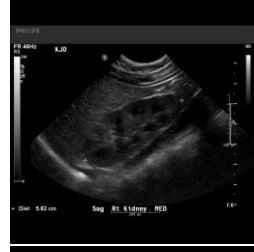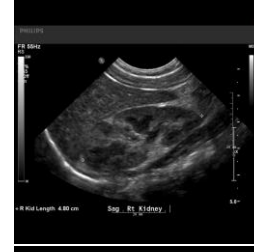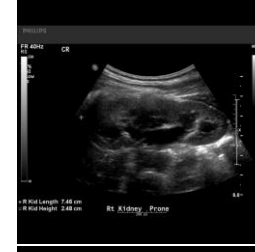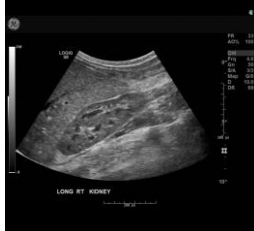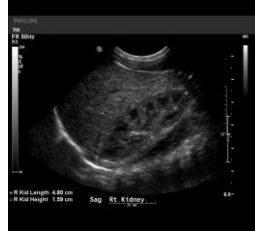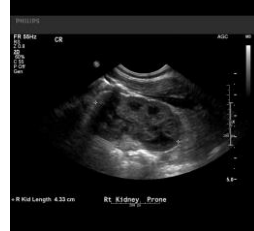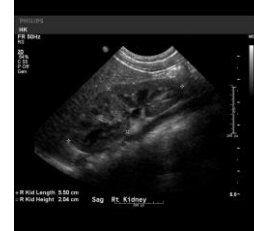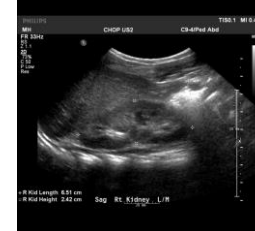

# Left kidneys of cases

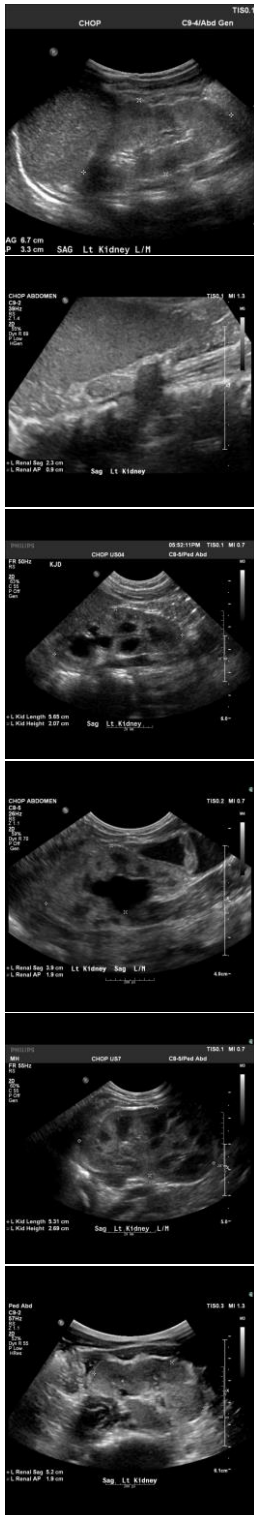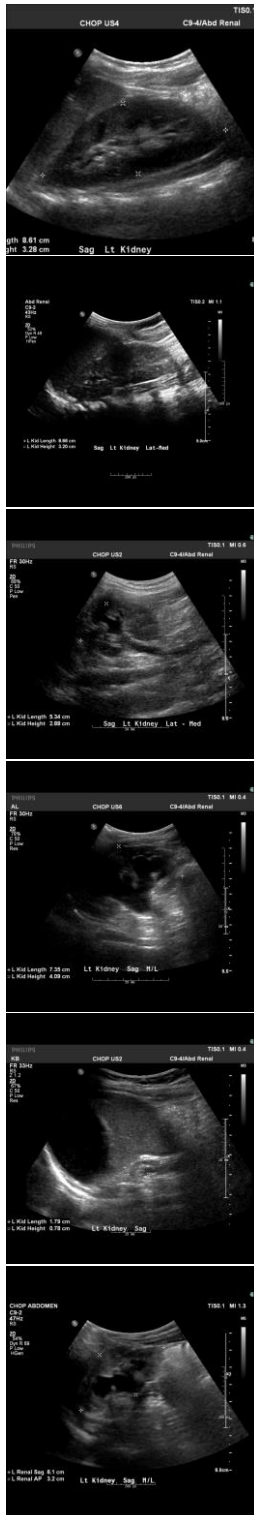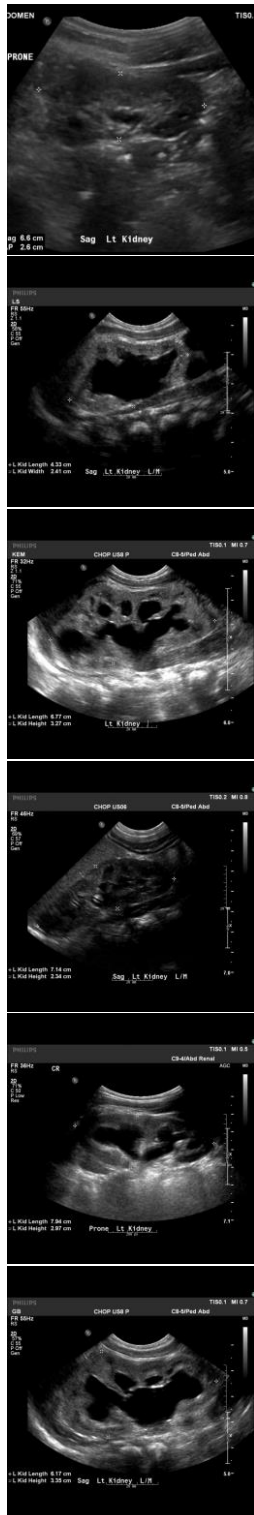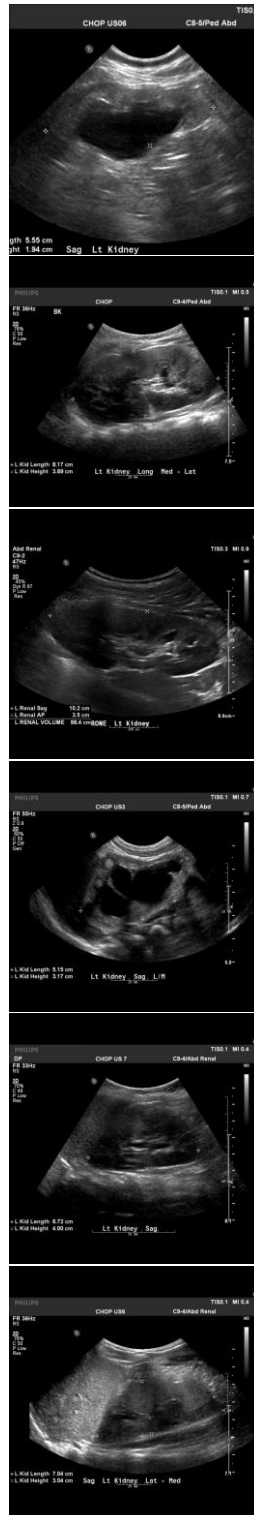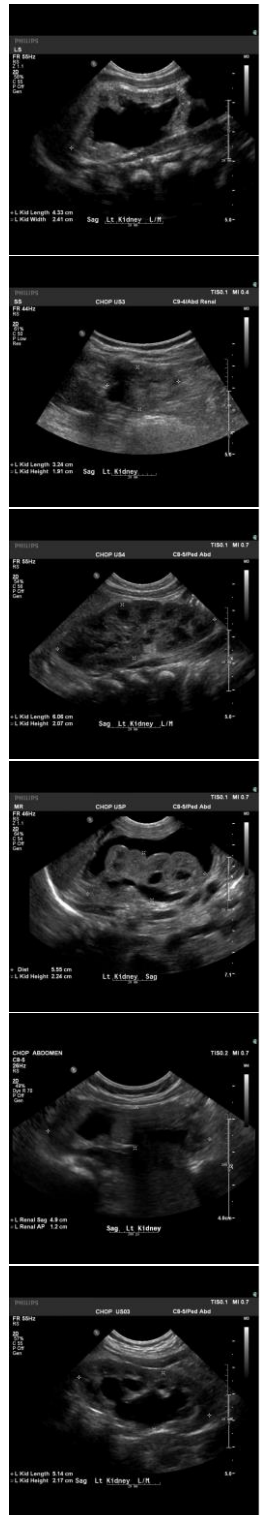

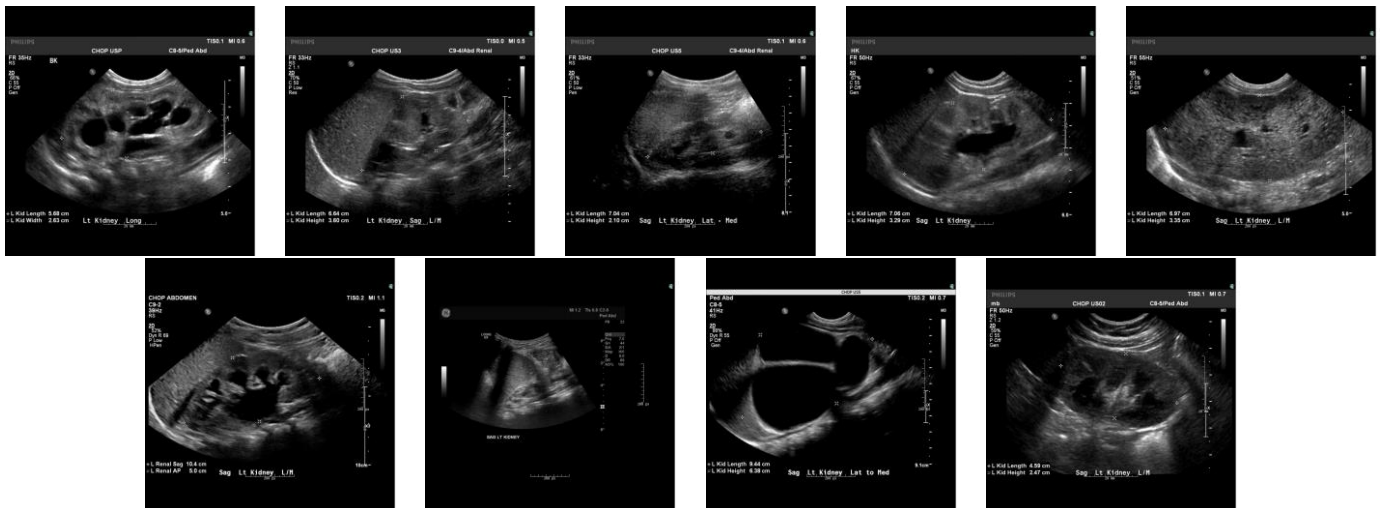

### Right kidneys of cases

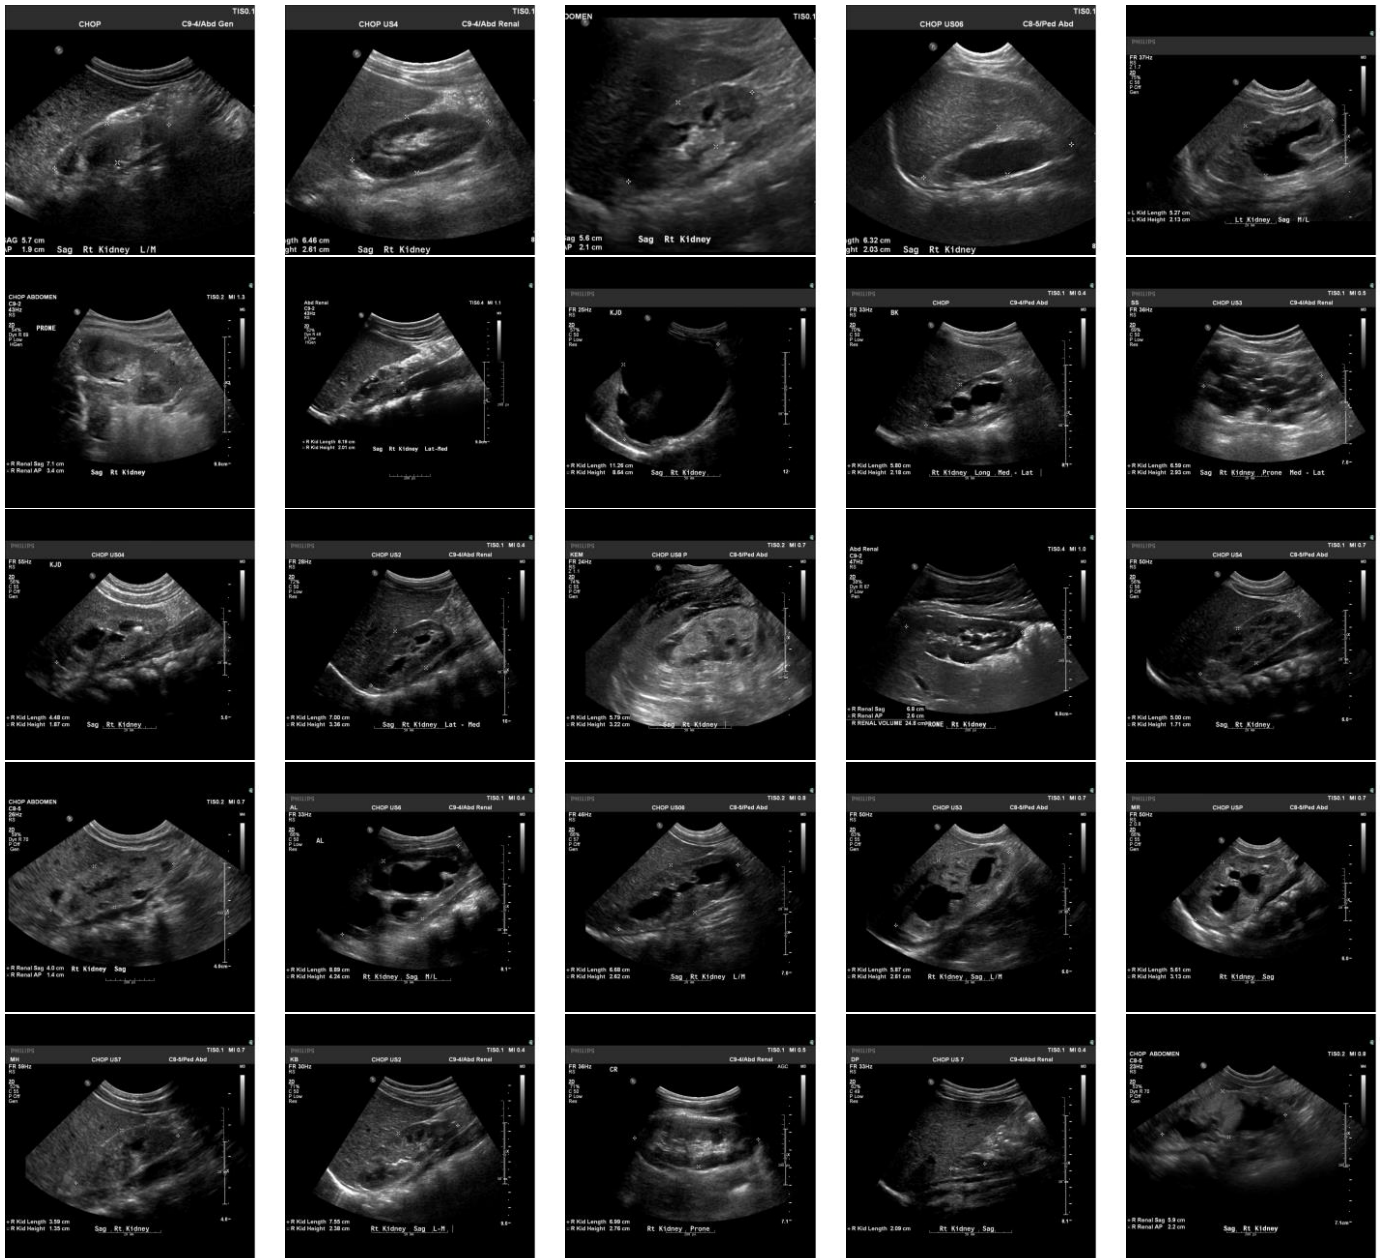

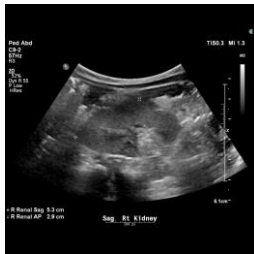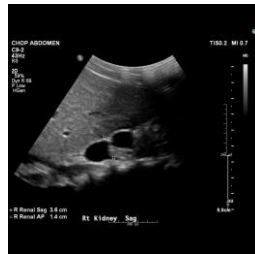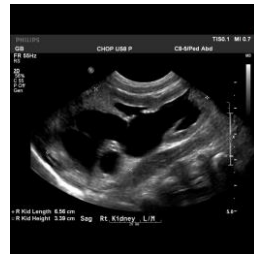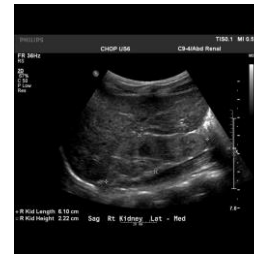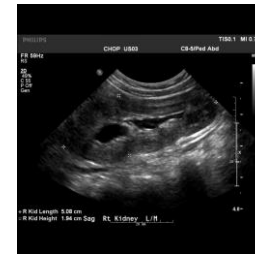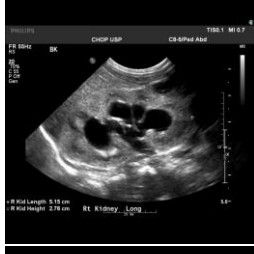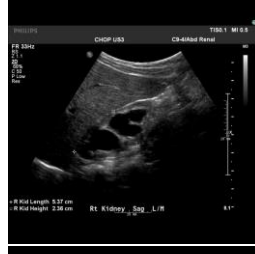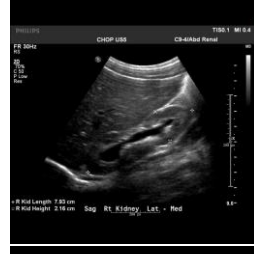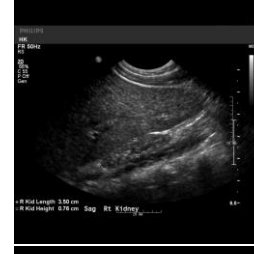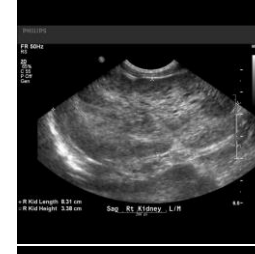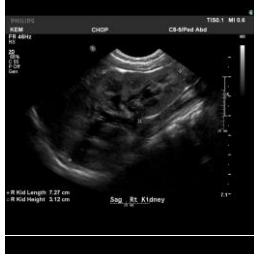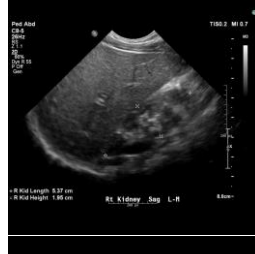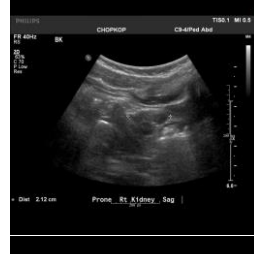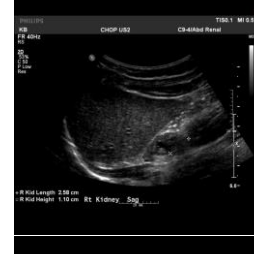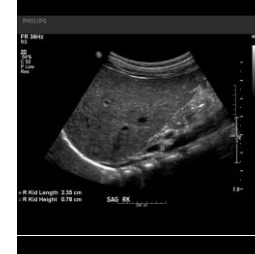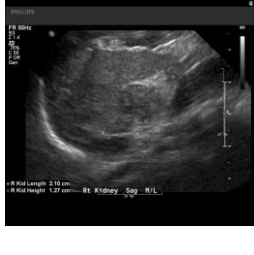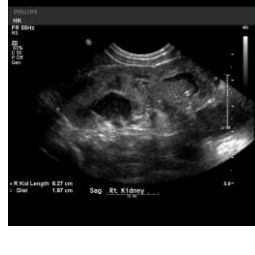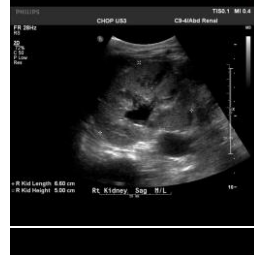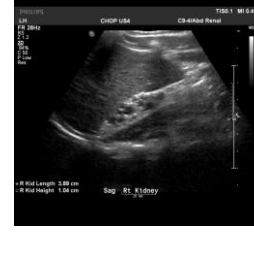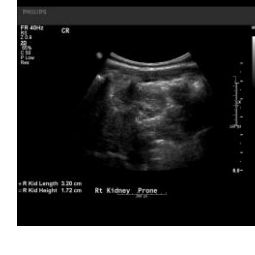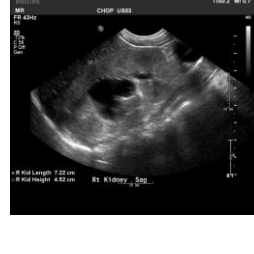

Supplement: NIHMS1514302-supplement-2.pdf [file NIHMS1514302-supplement-2.pdf]
